# Supplementary material for: Pregnancy at early age is associated with a reduction of progesterone-responsive cells and epithelial Wnt signaling in human breast tissue
Source: PubMed Central journal article supplement (PMC5410228; doi:10.18632/oncotarget.16023), 2017-03-08
Supplement: oncotarget-08-22353-s001.pdf [file oncotarget-08-22353-s001.pdf]

# Pregnancy at early age is associated with a reduction of progesterone-responsive cells and epithelial Wnt signaling in human breast tissue

## Supplementary Material

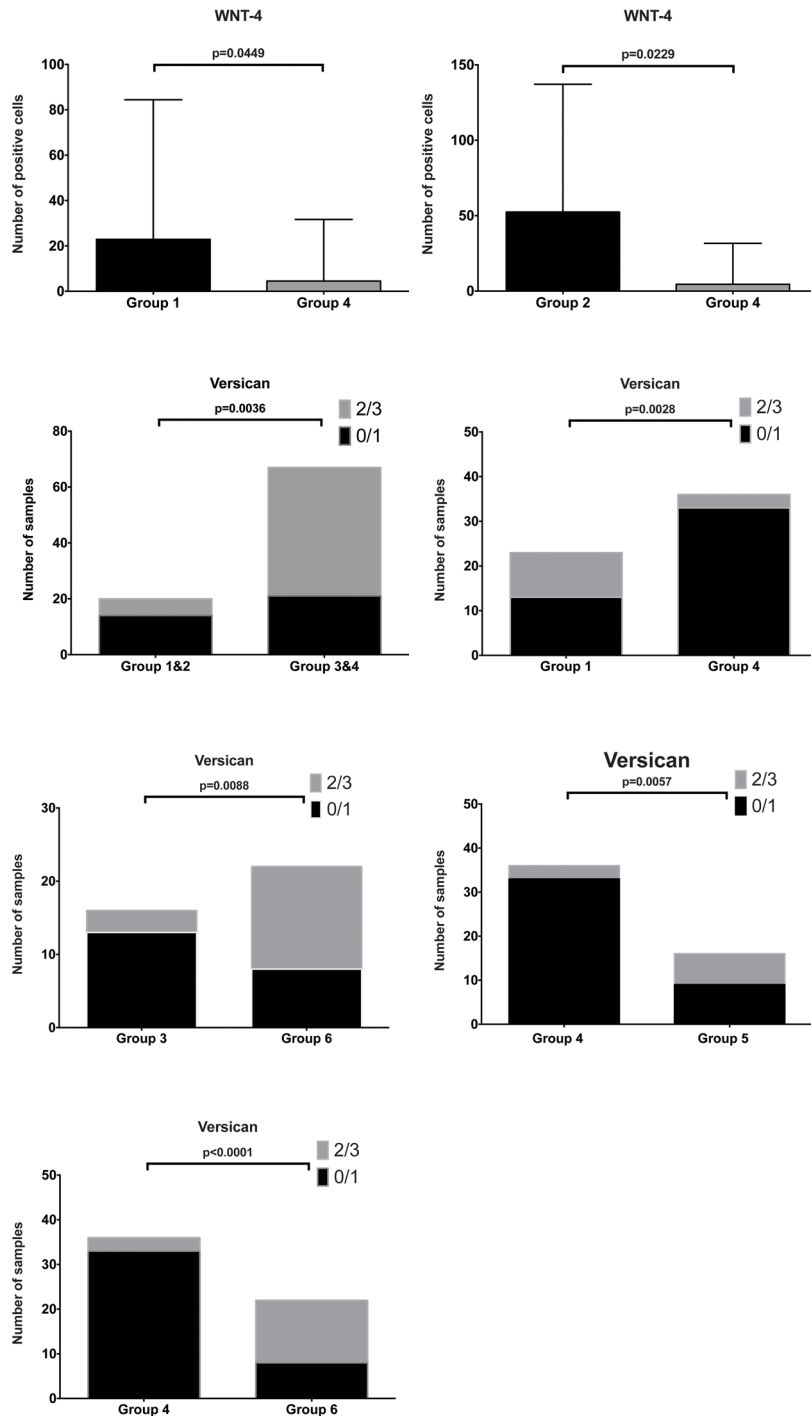

Supplementary Figure 1:
